# Supplementary material for: Plocabulin, a Novel Tubulin Inhibitor, Has Potent Antitumour Activity in Patient-Derived Xenograft Models of Soft Tissue Sarcoma
Source: MDPI journal article supplement (doi:10.3390/ijms23137454), 2022-07-05
Supplement: s1 [file s1]

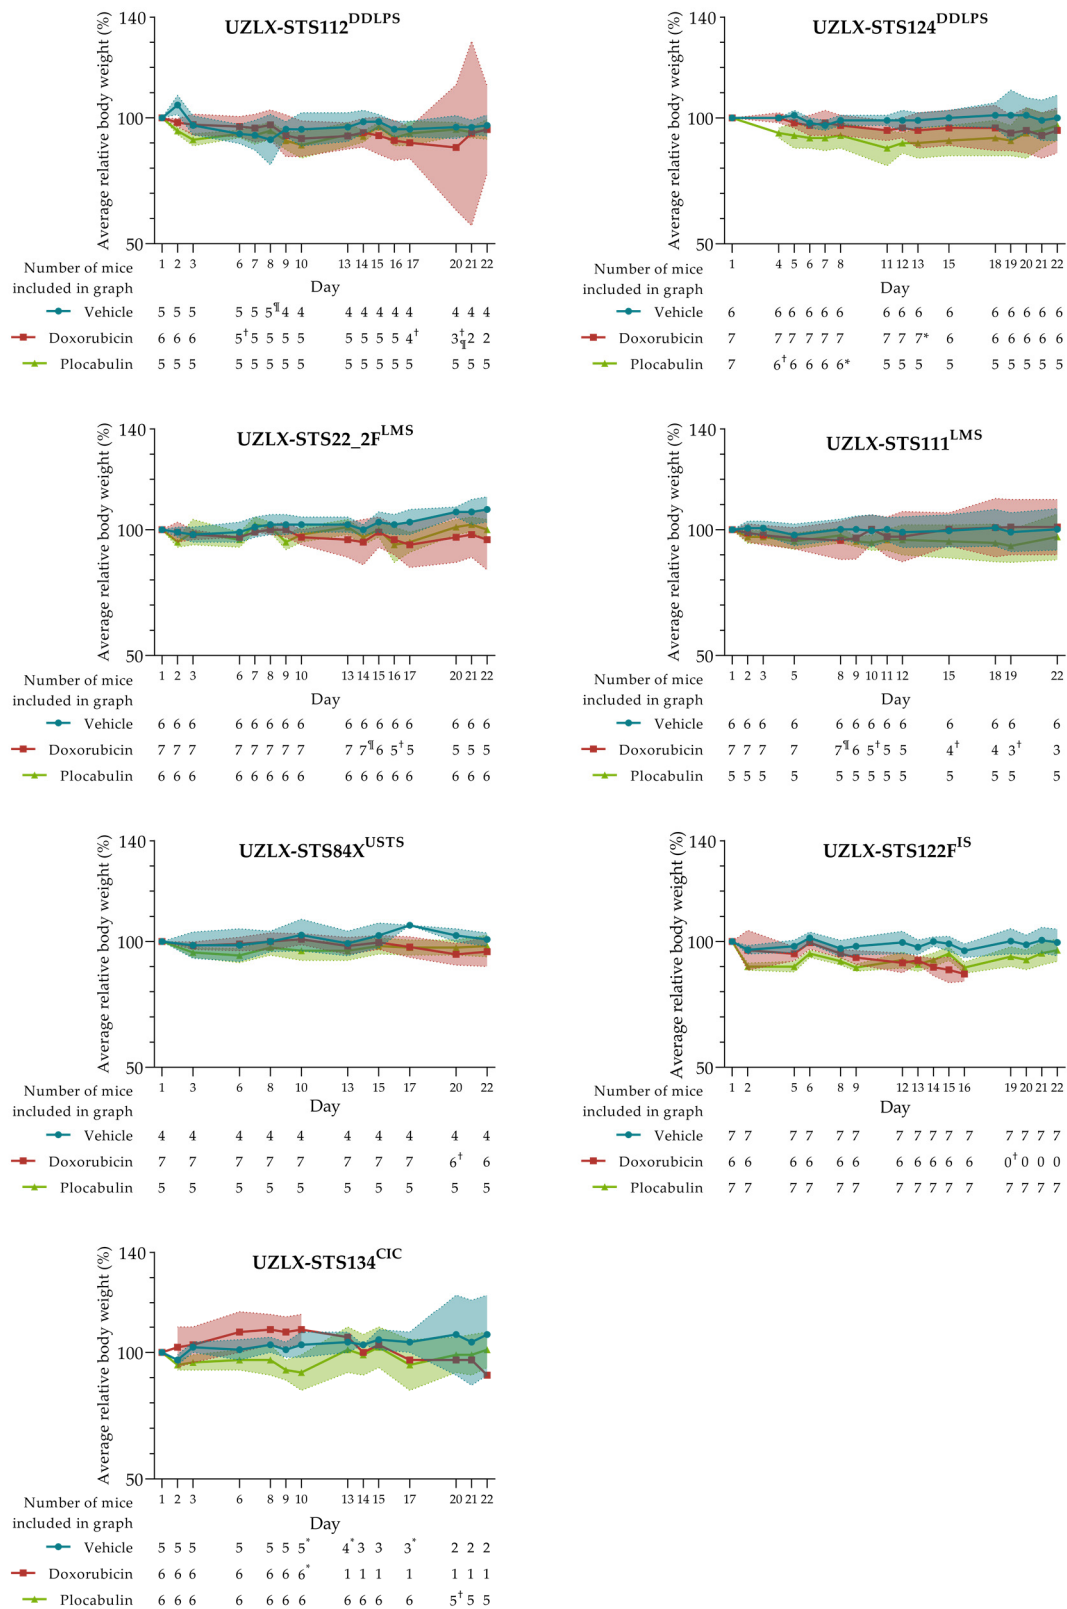

**Figure S1.** No severe weight loss was observed with plocabulin. Detailed overview of body weight evolution, per treatment group per model. A detailed overview of the number of mice included on each day is shown below each graph. Data graphed as mean and with 95% confidence interval as shaded area. †: mouse/mice found dead; \*: mouse/mice sacrificed due to

tumour volume exceeding ethical limits; ¶: mouse/mice sacrificed due to illness.
